# Supplementary material
Source: HighWire-hosted journal article supplement (https://ez-admanager.com/highwire/filestream/136820/field_highwire_adjunct_files/0/hermann_1407.pdf)
Supplement: hermann_1407.pdf [file hermann_1407.pdf]

# Rol de los trastornos respiratorios del sueño y las alteraciones del sueño y el despertar en el infarto cerebral y su recuperación

Dirk M. Hermann, MD  
Claudio L. Bassetti, MD

Correspondencia y solicitud de separatas al Prof. Dr. med. Hermann: dirk.hermann@uk-essen.de o Prof. Dr. med. Bassetti: claudio.bassetti@insel.ch

## RESUMEN

**Antecedentes:** Los trastornos respiratorios del sueño (TRS) y las alteraciones del sueño y el despertar (ASD) son altamente prevalentes en pacientes con infarto cerebral. Estudios recientes sugieren que representan tanto un factor de riesgo como una consecuencia del infarto cerebral y afectan la recuperación del infarto, su pronóstico y su recurrencia.

**Métodos:** Revisión de la literatura.

**Resultados:** Varios estudios han probado que los TRS representan un factor de riesgo independiente para el infarto cerebral. Se recomiendan estudios del sueño en pacientes con AIT e infarto cerebral en función de la muy alta prevalencia (> 50%) de los TRS (Clase IIb, nivel de evidencia B). El tratamiento del TRS obstructivo con presión de aire positiva continua está recomendado, dada la fuerza de la evidencia que va en aumento y apoya su efecto positivo en el pronóstico (Clase IIb, nivel de evidencia B). El oxígeno, la presión de aire positiva bifásica y la servoventilación adaptativa pueden ser considerados en pacientes con TRS centrales. Recientemente, tanto la duración del sueño alargada y acortada, como también la hipersomnia, el insomnio y el síndrome de piernas inquietas (SPI), también parecen aumentar el riesgo de infarto cerebral. Principalmente los estudios experimentales encontraron que las ASD pueden, además, alterar los procesos de neuroplasticidad y la recuperación funcional del infarto cerebral. Los tratamientos de las ASD con hipnóticos y antidepresivos sedativos (insomnio), antidepresivos activadores o estimulantes (hipersomnia), drogas dopaminérgicas (SPI) y clonazepam (parasomnias) está basado en observaciones de casos y deberían ser usados con precaución.

**Conclusiones:** Los TRS y las ASD aumentan el riesgo de infarto cerebral en la población general y afectan su recuperación y el pronóstico a corto y largo plazo. Los conocimientos actuales apoyan la implementación sistemática de procedimientos clínicos para el diagnóstico y el tratamiento de los TRS y las ASD post infarto cerebral en las unidades de stroke. *Neurology*® 2016;87:1407–1416.

## GLOSARIO

**ASD** = alteraciones del sueño y el despertar; **AOL** = actividad de onda lenta; **AOS** = apnea obstructiva del sueño; **ASC** = apnea del sueño central; **EC** = enfermedad coronaria; **CPAP** = *continuous positive airway pressure* (presión de aire positiva continua); **IAH** = índice apnea-hipopnea; **IC** = intervalo de confianza; **IMC** = índice de masa corporal; **MPES** = movimientos periódicos de las extremidades durante el sueño; **NREM** = no REM; **OR** = *odds ratio*; **RCS** = respiración de Cheyne-Stokes; HR = *hazard ratio* (razón de riesgo); **SDE** = somnolencia diurna excesiva; **SPI** = síndrome de piernas inquietas; **TCSR** = trastornos de comportamiento del sueño REM; **TRS** = trastornos respiratorios del sueño.

Los trastornos respiratorios del sueño (TRS) y las alteraciones del sueño y el despertar (ASD) son altamente prevalentes en las enfermedades neurológicas, influenciando su incidencia, curso y pronóstico, lo cual ha sido relacionado con que el sueño tiene funciones neurorestitutivas.<sup>1,2</sup> En esta revisión, repasamos los datos que sugieren que los trastornos del sueño y el despertar representan tanto un factor de riesgo como una consecuencia del infarto cerebral, que modula la recuperación y su pronóstico. Por este motivo, realizamos una búsqueda exhaustiva en PubMed en diciembre de 2015, con los términos sueño o somnolencia o insomnio o hipersomnia o síndrome de piernas inquietas o movimientos periódicos de las extremidades durante el sueño e infarto cerebral, que arrojó 2691 resultados. Los artículos fueron seleccionados sobre la base de su contribución a nuestro entendimiento actual de las conexiones sueño/infarto cerebral. Las revisiones sistemáticas y los meta-análisis fueron utilizados de forma extensiva para evaluar la evidencia en investigación. Presentamos los desafíos diagnósticos y las recomendaciones de tratamiento.

Del Department of Neurology (D.M.H.), University Hospital Essen, Germany; and Department of Neurology (C.L.B.), University Hospital Berne, Switzerland.

Ir a [Neurology.org](http://Neurology.org) para declaraciones de intereses completas. La información sobre fondos y aquellas declaraciones relevantes para los autores, si existiesen, se encuentran al final del artículo.

El cargo por el procesamiento del artículo fue pagado por los autores.

Este es un artículo de acceso libre distribuido bajo los términos de la Creative Commons Attribution-Non Commercial-No Derivatives License 4.0 (CC BY-NC-ND), que permite la descarga y distribución del trabajo, siempre y cuando esté correctamente citado. Este trabajo no puede ser modificado de ninguna manera o utilizado comercialmente.

**SUEÑO ALTERADO EN PACIENTES CON INFARTO CEREBRAL** Respiración alterada durante el sueño. En un meta-análisis de 29 estudios con 2343 pacientes con infarto cerebral isquémico o hemorrágico o accidente isquémico transitorio (AIT), 72%, 63% o 38% revelaron TRS definido por un índice apnea-hipopnea (IAH) > 5/h, > 10/h o > 20/h.<sup>3</sup> Los TRS fueron más severos en el infarto cerebral agudo y mejoraron durante la recuperación. Un 53% de los pacientes continuaron con un IAH > 10/h luego de 4 semanas.<sup>3</sup> Los TRS tuvieron una prevalencia similar en el infarto cerebral y en el AIT,<sup>2</sup> lo que indica que, en su mayoría, representan una condición preexistente. En un estudio de corte transversal en 335 pacientes con infarto cerebral agudo o AIT, los TRS estuvieron asociados con infarto al despertar, cuando estaban acompañados de shunts cardíacos derecha-izquierda,<sup>4</sup> lo que indica que los TRS pueden provocar una embolia paradójica. Estudios iniciales no encontraron asociación entre los TRS y la topografía del infarto cerebral. Cohortes basadas en poblaciones<sup>5</sup> y clínicas<sup>6</sup> recientemente notaron una asociación entre los TRS y el infarto de tronco encefálico, lo que sugiere que la disfunción de los pares bajos agrava los TRS. La forma más común de TRS es la apnea obstructiva del sueño (AOS), que es causada por el cese del flujo nasal debido a colapso de la vía aérea superior. No es raro que los pacientes con infarto cerebral muestren combinaciones de AOS y tipos centrales de TRS; esto es, apnea del sueño central (ASC) y respiración de Cheyne-Stokes (RCS).<sup>2,7</sup>

La ASC está caracterizada por fluctuaciones cíclicas en el centro respiratorio e hiperpneas que alternan con apneas o hipopneas. La ASC/RCS fue primero descrita en el infarto cerebral bilateral, asociado con alteración de conciencia o insuficiencia cardíaca. La insuficiencia cardíaca está asociada con cambios en los fluidos nocturnos con reducción del volumen en piernas y aumento de la circunferencia del cuello, que predispone al colapso de la vía aérea superior.<sup>8</sup> Más recientemente, se encontró RCS durante el sueño en el infarto cerebral unilateral con conciencia preservada sin insuficiencia cardíaca sobregregada. La ASC/RCS en el infarto cerebral agudo estuvo relacionada con la disfunción cardíaca oculta<sup>9</sup> o la disrupción de las redes autonómicas centrales.<sup>2</sup> Las ASC/RCS mejoran en la fase de infarto cerebral subagudo. En el infarto cerebral crónico, las ASC/RCS están fuertemente asociadas con insuficiencia cardíaca.<sup>9</sup>

**Hipersomnia/sueño excesivo/somnolencia diurna excesiva (SDE).** La hipersomnia, o sea el aumento del sueño, se encuentra principalmente luego del infarto subcortical y pontomesencefálico. En 285 pacientes consecutivos evaluados luego de 21 ± 18 meses, fueron frecuentes la hipersomnia (27% de los pacientes con necesidad de dormir ≥ 10 h/d), la SDE (28% con puntaje en la *Epworth Sleepiness Scale* [Escala de Somnolencia de Epworth] ≥ 10) y la fatiga (46% con puntaje en la *Fatigue Severity Scale* [Escala de Severidad de Fatiga] ≥ 4,0).<sup>2</sup> Aunque la hipersomnia mejore durante los primeros meses post infarto cerebral,

la fatiga puede persistir por años. La forma más drástica de hipersomnia post infarto cerebral aparece luego del infarto talámico paramediano. Inicialmente, los pacientes exhiben una hipersomnia severa y comportamiento somnoliento durante hasta 20 h/d, asociado a déficits en la atención, la cognición y la memoria.<sup>10,11</sup> La hipersomnia mejora en meses, mientras que los déficits cognitivos pueden persistir, particularmente luego del infarto cerebral izquierdo y bilateral.<sup>11</sup> Los pacientes con infarto cerebral bilateral pueden reportar aumento de requerimiento de sueño durante años.

**Insomnio/sueño reducido.** El insomnio, o sea la dificultad para dormirse y permanecer dormido, es altamente prevalente en pacientes con infarto cerebral. Durante los primeros meses post infarto cerebral, la prevalencia del insomnio puede ser tan alta como 50%.<sup>2</sup> Un tercio de los insomnios aparecen *de novo*; dos tercios de los pacientes ya tenían insomnio antes del infarto cerebral. El insomnio post infarto cerebral frecuentemente es el resultado de factores ambientales (luz, ruido en las unidades de stroke) o comorbilidades (TRS, depresión, dolor). Menos comúnmente, el insomnio puede estar directamente relacionado con daño cerebral. En el infarto pontomesencefálico se ha reportado una pérdida casi completa del sueño.<sup>2</sup> En el infarto talámico paramediano, el insomnio puede reflejar la ausencia de husos de sueño.<sup>11</sup> En veteranos de guerra con injuria cerebral penetrante, el insomnio estuvo asociado con daño de la corteza prefrontal dorsomediana izquierda.<sup>12</sup>

**Síndrome de piernas inquietas (SPI)/movimientos periódicos de las extremidades durante el sueño (MPES).** En 2 series de 96 o 137 pacientes examinados dentro de los 15 días o al mes post infarto cerebral, 12% o 13% cumplieron criterios de SPI, o sea, la urgencia de mover las piernas que mejora con la actividad y empeora por la tarde y noche y en reposo.<sup>13,14</sup> Dos tercios de los pacientes tuvieron síntomas de SPI bilaterales; un tercio tuvo síntomas unilaterales, contralaterales al infarto cerebral.<sup>13</sup> El SPI estuvo frecuentemente acompañado por MPES, o sea, los movimientos periódicos involuntarios de las extremidades durante el sueño no-REM (NREM). Los pacientes que exhiben SPI tienen una circunferencia mayor del cuello y mayor prevalencia de diabetes que los pacientes sin SPI.<sup>14</sup> La calidad del sueño estuvo reducida en estos pacientes. Los MPES son incluso más prevalentes que el SPI en los pacientes con infarto cerebral. En un estudio de casos y controles de 35 pacientes con infarto cerebral isquémico agudo supratentorial, se encontró un índice de MPES > 5/h en el 77% de los pacientes, pero solo en el 29% de los controles pareados según edad y sexo.<sup>15</sup> Los MPES fueron contralaterales al infarto cerebral en el 70% y bilaterales en el 30%.

**Trastorno del comportamiento del sueño REM (TCSR).** En el TCSR, los pacientes actúan en el sueño, exhibiendo pérdida de la atonía y aumento de la actividad muscular fásica durante

el sueño REM. Luego de observaciones de TCSR temprano en pacientes con infartos del tronco encefálico,<sup>2</sup> una evaluación reciente en 119 pacientes con infarto cerebral isquémico estimó una prevalencia de TCSR ~11%.<sup>16</sup> Un 46% de los pacientes con TCSR tuvieron infartos del tronco encefálico.<sup>16</sup>

**EL SUEÑO ALTERADO COMO FACTOR DE RIESGO DE INFARTO CEREBRAL** Trastorno respiratorio del sueño. Luego de un estudio seminal en 1022 pacientes admitidos en un laboratorio del sueño, que reportó una asociación del TRS definido como un IAH  $\geq$  5/h con el infarto cerebral incidental, AIT y muerte a los 6 años de seguimiento luego del ajuste para los factores de riesgo vasculares,<sup>17</sup> 4 estudios poblacionales evaluaron el valor predictivo del TRS para el riesgo de infarto cerebral:

1. El estudio de cohorte de sueño de Wisconsin incluyó 1475 participantes.<sup>18</sup> El TRS definido como IAH  $\geq$  20/h estuvo asociado en un análisis de corte transversal con la historia de infarto cerebral, luego de ser ajustado para edad, sexo y factores de riesgo vasculares (*odds ratio* [OR] 4,33; intervalo de confianza [IC] 1,32-14,24). En un análisis longitudinal que incluyó 1189 participantes, se registraron 22 infartos cerebrales incidentales de primera vez a lo largo de 4 años. El TRS fue predictivo del infarto cerebral en una regresión univariada. Luego de ajustar para edad, sexo e índice de masa corporal (IMC), esta asociación ya no fue significativa.
2. En el Proyecto de Sueño de Victoria, 394 participantes no institucionalizados con infarto cerebral > 70 años fueron seguidos durante 6 años (20 infartos cerebrales incidentales).<sup>19</sup> El TRS definido como un IAH > 30/h predijo el infarto cerebral en una regresión ajustada para sexo (*hazard ratio* [HR] 2,52; IC 1,04-6,01). Debido al poder estadístico limitado, la edad y los factores de riesgo vascular no pudieron ser usados como variable de ajuste.
3. El Estudio Saludable de Sueño y Corazón fue una cohorte poblacional de 5422 participantes  $\geq$  40 años seguidos durante 8,7 años.<sup>20</sup> Ocurrieron un total de 193 infartos cerebrales. La AOS predijo el infarto cerebral isquémico en regresiones multivariadas ajustadas para edad, sexo y factores de riesgo vascular en hombres (HR [4to vs 1er cuartil IAH] 2,86; IC 1,10-7,39), pero no en mujeres (HR 1,21; IC 0,65-2,24).
4. En un relevamiento nacional entre 4,5 millones de ciudadanos daneses, 33.274 participantes desarrollaron apnea del sueño durante 11 años (edad media 53 años; 79% hombres), de los cuales 44% recibieron terapia con presión de aire positiva continua (CPAP) persistente.<sup>21</sup> Ocurrieron un total de 150.294 infartos cerebrales isquémicos. La apnea del sueño predijo el infarto cerebral isquémico luego de ser ajustado para edad, sexo y factores de riesgo vascular (HR 1,23; IC 1,11-1,36). Este efecto fue específicamente visto en participantes < 50 años (HR 1,80; IC 1,36-2,39).

Un meta-análisis de estudios prospectivos clínicos y poblacionales concluyeron que el TRS es un predictor de infarto cerebral independiente (OR 2,24; IC 1,5-3,19).<sup>22</sup> El riesgo de infarto cerebral aumenta con el IAH.<sup>22</sup> El meta-análisis estableció que la evidencia era escasa en mujeres. Más recientemente, un grupo taiwanés evaluó las consecuencias del TRS relacionadas con el sexo, en una cohorte grande de 29.961 participantes con TRS que fueron comparados con 119.844 controles pareados por edad y sexo sin TRS.<sup>23</sup> Durante el seguimiento de hasta 14 años, la incidencia de infarto cerebral estuvo aumentada en ambos sexos, notablemente con más diferencia en mujeres que en hombres (HR 1,44 [IC 1,20-1,72] y HR 1,21 [IC 1,01-1,24], respectivamente, luego de ajustar para edad y factores de riesgo vascular). Más interesante aún, la incidencia de infarto cerebral estuvo más aumentada en mujeres jóvenes  $\leq$  35 años (HR 4,90 [IC 1,93-12,40]).

Los mecanismos subyacentes al riesgo elevado de infarto cerebral en pacientes con TRS han sido resumidos previamente.<sup>24</sup> La hipoxia recurrente en la AOS está acompañada por cambios en la presión intratorácica, la activación simpática y los cambios en la presión arterial, que vía estrés oxidativo, disfunción endotelial e inflamación, predispone a la hipertensión arterial fármaco-resistente, la aterosclerosis, las arritmias cardíacas, la hipercoagulación, la insuficiencia cardíaca y las embolias paradójales. La terapia con CPAP atenúa estas consecuencias.

**Hipersomnia/sueño excesivo/SDE.** Un meta-análisis de 11 estudios comunitarios representativos con 559.252 participantes y 11.695 infartos cerebrales reveló que el sueño prolongado, en su mayoría definido como  $\geq$  8-9 horas de sueño/noche en cuestionarios, es un predictor independiente de infarto cerebral luego de ajustar para edad, sexo, factores de riesgo vascular y comorbilidades (HR 1,45; IC 1,30-1,62).<sup>25</sup> En 2 estudios poblacionales que involucraban 9095 participantes que fueron seguidos durante 5,1 años cada uno (en total 208 infartos cerebrales incidentales), la presencia de TRS significativo (Escala de Somnolencia de Epworth  $\geq$  10/24) o frecuente predijo el infarto cerebral, luego de ser ajustado para edad, sexo, factores de riesgo vascular y comorbilidades (HR 3,00; IC 1,57-5,73 y HR 2,10; IC 1,13-3,89, respectivamente).<sup>26,27</sup> En un análisis de corte transversal en uno de estos estudios, que incluyó 1244 participantes sin infarto cerebral que se realizaron una RM, el sueño prolongado estuvo asociado con hiperintensidades en la sustancia blanca subcortical,<sup>28</sup> lo que sugiere que el sueño excesivo puede resultar de una enfermedad cerebral de pequeño vaso, reflejando marcadores de aterosclerosis subclínica.

**Insomnio/sueño reducido.** Luego de estudios previos inconsistentes, un meta-análisis reciente encontró que el sueño corto, definido como  $\leq$  5-6 horas de sueño/noche en cuestionarios, es un predictor independiente de infarto cerebral inci-

dental, luego de ser ajustado para edad, sexo, factores de riesgo vascular y comorbilidades, aunque con menor HR que el sueño prolongado (1,15; IC 1,07-1,24).<sup>25</sup> El riesgo de infarto cerebral podría depender de la presencia de quejas clínicas del sueño. En 2 estudios poblacionales representativos de casos y controles que incluyeron 21.438 y 22.040 insomnes, que fueron seguidos por 4 o 10 años, respectivamente (1545 y 1049 infartos cerebrales incidentales), el insomnio diagnosticado por el médico fue predictivo de infarto cerebral luego de ser ajustado para edad, sexo, factores de riesgo vascular, depresión, ansiedad y estatus socioeconómico (HR 1,54; 1,38-1,72 y 1,85; 1,62-2,12).<sup>29,30</sup> En una cohorte poblacional sueca de 41.192 participantes seguidos durante 13,2 años (4031 eventos vasculares, que incluían 1685 infartos cerebrales incidentales), el sueño corto, definido como  $\leq 5$  horas de sueño/noche, fue predictivo de eventos cardiovasculares cuando estuvo asociado con dificultad para dormirse, dificultad para mantener el sueño, despertar temprano o sueño no reparador, pero no cuando no estuvo asociado a estas quejas.<sup>31</sup> Las posibles razones para el riesgo elevado de infarto cerebral pueden incluir el estrés crónico.

**SPI/MPES.** Luego de hallazgos inconsistentes de estudios de corte transversal en relación con la asociación del SPI con el infarto cerebral y la enfermedad coronaria (EC), estudios longitudinales en cohortes poblacionales y profesionales de la salud reportaron que el SPI al momento basal es predictor de EC y muerte incidental,<sup>32</sup> pero no de infarto cerebral,<sup>33,34</sup> además de la edad, el sexo y los factores de riesgo vascular. En 2 estudios de infarto cerebral,<sup>33,34</sup> 54.558 participantes fueron seguidos durante 2,1-7,3 años (673 infartos cerebrales incidentales).

En 2 cohortes poblacionales representativas que incluían 5620 y 7392 participantes que fueron seguidos durante hasta 8,1 años, los factores de riesgo vascular, entre ellos hipertensión arterial, diabetes, hipercolesterolemia e IMC, fueron predictores de SPI incidental.<sup>34,35</sup> En el mayor de estos estudios, el SPI incidental fue predictor de infarto cerebral incidental, que en este estudio ocurrió en 397 participantes.<sup>35</sup> La evidencia combinada de estos estudios es todavía insuficiente para justificar conclusiones finales sobre las conexiones mutuas entre el SPI y el infarto cerebral.

En 1093 pacientes con enfermedad renal terminal, que conlleva un riesgo vascular particularmente alto, el SPI fue predictor de infarto cerebral durante un seguimiento de 3,7 años luego de ajustar para edad, sexo, factores de riesgo vascular (HR 2,64; 1,49-4,91).<sup>36</sup> Se ha sugerido que las consecuencias del SPI dependen de la duración de las quejas de SPI. En el estudio de EC más grande, que incluyen 70.977 participantes con 5,6 años de seguimiento, el SPI fue predictor de la EC cuando las quejas de SPI persistían por  $\geq$

3 años.<sup>32</sup> Los MPES asociados a SPI están acompañados por elevaciones de la presión arterial de corta duración y de hiperactividad simpática.<sup>2</sup> Todavía debe demostrarse si estas respuestas autonómicas son capaces de inducir hipertensión arterial.

### **SUEÑO ALTERADO Y RECUPERACIÓN Y PRONÓSTICO DE INFARTO CEREBRAL**

**Trastorno respiratorio del sueño.** En una revisión sistemática, se identificaron 10 estudios que incluían 1203 pacientes con infarto cerebral y AIT, en los cuales se analizaron los efectos del TRS en el pronóstico del infarto cerebral, o sea, muerte o recurrencia de eventos vasculares.<sup>37</sup> Todos los estudios reportaron riesgos elevados para muerte o eventos vasculares, respectivamente. Casi todos los estudios tenían seguimientos  $\leq 2$  años. Solo 2 estudios, que evaluaban cohortes de 132 y 166 pacientes con 10 o 7 años de seguimiento (116 y 89 muertes, respectivamente), tuvieron el poder suficiente para análisis de regresión multivariada. En estos estudios, la AOS, definida como un IAH  $\geq 15$ /h o IAH  $\geq 20$ /h, fue predictiva de muerte (HR 1,76; 1,05-2,95) o eventos cardiovasculares no fatales (principalmente infarto cerebral recurrente) (HR 1,76; 1,12-2,68) además de la edad, el sexo, los factores de riesgo vascular y el índice de Barthel. Estudios previos más chicos reportaron que el TRS afecta de forma negativa la presión arterial post infarto cerebral, la recuperación neurológica temprana y la duración de la hospitalización.<sup>2</sup> Estos estudios no tuvieron el poder para hacer un análisis multivariado.

**Hipersomnia/sueño excesivo/SDE.** La hipersomnia/SDE altera la recuperación del infarto cerebral, como se muestra en una cohorte de 213 pacientes con infarto cerebral admitidos en una unidad de rehabilitación aguda, en la cual la hipersomnia detectada por los terapeutas de rehabilitación fue predictiva de discapacidad y enfermería domiciliaria al alta.<sup>38</sup> En un registro nacional de 8194 pacientes con infarto cerebral, la presencia de fatiga 2 años post infarto cerebral estuvo asociada con enfermería domiciliaria y mortalidad en el año siguiente (297 muertes) luego de ajustar para edad, sexo, tipo de infarto cerebral y actividades de la vida diaria.<sup>39</sup> Este estudio no se ajustó para condiciones médicas no relacionadas al infarto cerebral (por ej., infecciones, enfermedades cardiovasculares).

**Insomnio/sueño reducido.** En los pacientes con infarto cerebral agudo, el insomnio evaluado por cuestionarios estuvo asociado con una pobre satisfacción de vida, además de depresión e infarto cerebral severo.<sup>2</sup>

En modelos experimentales de infarto cerebral, la pérdida/deprivación de sueño pareció aumentar la injuria cerebral y alterar la neuroplasticidad,<sup>40</sup> mientras que los fármacos que

**Tabla 1 Efectos de la presión de aire positiva continua (CPAP) y otras terapias para el trastorno respiratorio del sueño (TRS) post infarto cerebral**

| Estudio                               | Tipo                                                              | Pacientes                                                                                                                                                                                                                                                                                                                                                                                                                                            | Edad, años                                                        | IMC, kg/m <sup>2</sup>                                           | Hallazgos                                                                                                                                                                                                                                                                                                                                                                                                                                                                                                                                                                                                                                                                                                                                                                                                                                                                                 |
|---------------------------------------|-------------------------------------------------------------------|------------------------------------------------------------------------------------------------------------------------------------------------------------------------------------------------------------------------------------------------------------------------------------------------------------------------------------------------------------------------------------------------------------------------------------------------------|-------------------------------------------------------------------|------------------------------------------------------------------|-------------------------------------------------------------------------------------------------------------------------------------------------------------------------------------------------------------------------------------------------------------------------------------------------------------------------------------------------------------------------------------------------------------------------------------------------------------------------------------------------------------------------------------------------------------------------------------------------------------------------------------------------------------------------------------------------------------------------------------------------------------------------------------------------------------------------------------------------------------------------------------------|
| <b>Sandberg et al.</b> <sup>43</sup>  | Estudio aleatorizado y ciego                                      | 63 pacientes con infarto cerebral isquémico con índice de alteración respiratoria $\geq 15$ /h reclutados en una unidad de rehabilitación a las 2-4 semanas post infarto; se realizó aleatorización a CPAP o no CPAP durante 28 días                                                                                                                                                                                                                 | 77 $\pm$ 8 (sin CPAP), 78 $\pm$ 6 (CPAP)                          | 25 $\pm$ 5 (sin CPAP), 24 $\pm$ 4 (CPAP)                         | El CPAP fue utilizado por 31 de 33 pacientes durante 4 semanas; media del uso del CPAP 4.1 $\pm$ 3.6 h/noche; el tratamiento con CPAP mejoró los síntomas depresivos, pero no cambió de forma significativa el puntaje de MMSE o el índice de Barthel; el bajo nivel cognitivo (puntaje MMSE) predijo un uso pobre del CPAP                                                                                                                                                                                                                                                                                                                                                                                                                                                                                                                                                               |
| <b>Hsu et al.</b> <sup>44</sup>       | Estudio aleatorizado y ciego (evaluación ciega de los resultados) | 30 pacientes con infarto cerebral con IAH $\geq 30$ /h reclutados a los 21-25 días post infarto cerebral; aleatorización a CPAP o no CPAP durante 8 semanas                                                                                                                                                                                                                                                                                          | Mediana 73 (Q1, Q3: 73, 81) (no CPAP), 74 (Q1, Q3: 65, 77) (CPAP) | Mediana 25 (Q1, Q3: 21, 29) (no CPAP), 27 (Q1, Q3: 22,33) (CPAP) | El uso medio del CPAP fue pobre (1.4 h/noche); el estudio fue interrumpido prematuramente debido al pobre reclutamiento; el tratamiento con CPAP no influyó en los resultados neurológicos, la ansiedad, la depresión o la calidad de vida; no hubo diferencia significativa en 24 horas en la presión arterial sistólica, diastólica y media entre grupos; 7 de 15 pacientes (47%) siguieron usando el CPAP durante más de 4 semanas; el tratamiento fue interrumpido en 8 pacientes debido a problemas con la máscara o la máquina, estados confusionales asociados al infarto cerebral o síntomas de la vía aérea superior; el uso del CPAP se correlacionó de forma positiva con un buen índice de Barthel y buenas capacidades del lenguaje                                                                                                                                          |
| <b>Bravata et al.</b> <sup>45</sup>   | Estudio aleatorizado y ciego                                      | 70 pacientes con AIT aleatorizados dentro de las 72 horas post AIT; pacientes con IAH $\geq 5$ /h recibieron o no CPAP durante 90 días; 12 pacientes (sin CPAP) vs 30 pacientes (CPAP) completaron el estudio                                                                                                                                                                                                                                        | 67 $\pm$ 13 (sin CPAP), 66 $\pm$ 12 (CPAP)                        | 28 $\pm$ 7 (sin CPAP), 29 $\pm$ 4 (CPAP)                         | Cuarenta por ciento de pacientes con TRS tuvieron un uso aceptable de CPAP ( $\geq 4$ h/noche) y 60% algún uso ( $< 4$ h/noche); 3 pacientes CPAP y 1 control tuvieron eventos vasculares recurrentes; hubo una tendencia no significativa hacia una menor tasa de eventos en pacientes con uso aceptable (0%) en comparación con los de algo de uso (6%) de CPAP ( $p = 0,08$ )                                                                                                                                                                                                                                                                                                                                                                                                                                                                                                          |
| <b>Svatikova et al.</b> <sup>46</sup> | Estudio aleatorizado y ciego de cruzamiento                       | En la primera fase del estudio, 18 pacientes con infarto cerebral isquémico con IAH $> 5$ /h fueron aleatorizados a terapia posicional (almohada terapéutica) o no (almohada regular) dentro de los primeros 14 días post infarto; tratamiento administrado durante las 2 noches consecutivas en un diseño de cruzamiento; en la segunda fase del estudio, los mismos 18 pacientes fueron aleatorizados a la terapia posicional o no durante 3 meses | Mediana 58 (Q1, Q3: 54, 68)                                       | Mediana 29 (Q1, Q3: 28, 33)                                      | En la comparación intra participantes (primera fase), la terapia posicional redujo el IAH de una mediana de 39/h (21/h, 54/h) a 27/h (22/h, 47/h); la almohada terapéutica redujo el tiempo supino de una mediana de 142 (31, 295) a 30 (3, 66) minutos; la mediana y la mínima saturación de oxígeno permanecieron sin cambio; en la segunda fase (comparación entre participantes) la adherencia auto-reportada fue de 3 (33%) todas las noches, 1 (11%) la mayoría de las noches, 2 (22%) algunas noches, y 3 (33%) ninguna noche, en los participantes aleatorizados a la terapia posicional; de aquellos aleatorizados a la almohada terapéutica, 7 (78%) tuvieron un buen resultado, mientras que 6 (67%) de los no aleatorizados a la almohada tuvieron un buen resultado                                                                                                          |
| <b>Ryan et al.</b> <sup>47</sup>      | Estudio aleatorizado y ciego (evaluación ciega de los resultados) | 44 pacientes con infarto cerebral con IAH $> 15$ /h fueron reclutados durante las 3 semanas post infarto; la aleatorización a CPAP o no-CPAP se hizo durante 4 semanas                                                                                                                                                                                                                                                                               | 61 $\pm$ 10 (sin CPAP), 63 $\pm$ 13 (CPAP)                        | 29 $\pm$ 5 (sin CPAP), 27 $\pm$ 6 (CPAP)                         | El uso de CPAP promedio fue 5.0 $\pm$ 2.3 h/noche; en cuanto a los resultados primarios, el tratamiento con CPAP mejoró los déficits neurológicos evaluados por la Escala Neurológica Canadiense, pero no en la distancia de caminata de 6 minutos, la respuesta sostenida de atención, y la evaluación digital y visual espacial; en cuanto a los resultados secundarios, el CPAP mejoró la somnolencia evaluada por la Escala de Somnolencia de Epworth, el componente motor de la medición de independencia funcional, la función de pierna inferior de Chedoke-McMaster, y el componente afectivo de la depresión                                                                                                                                                                                                                                                                     |
| <b>Bravata et al.</b> <sup>48</sup>   | Estudio aleatorizado y ciego                                      | 55 pacientes con infarto cerebral isquémico fueron aleatorizados en las 72 horas post infarto; los pacientes con IAH $\geq 5$ /h recibieron o no CPAP durante 30 días; 15 pacientes (sin CPAP) vs 16 pacientes (CPAP) completaron el estudio                                                                                                                                                                                                         | 72 $\pm$ 13 (sin CPAP), 71 $\pm$ 9 (CPAP)                         | 29 $\pm$ 7 (sin CPAP), 27 $\pm$ 4 (CPAP)                         | Un total de 62,5% de pacientes con TRS tuvieron uso de CPAP aceptable ( $\geq 4$ h/noche) y 37,5% algo de uso ( $< 4$ h/noche); la Escala de infarto NIH mejoró más en los pacientes con CPAP (-3,0) que en los controles (-1,0) ( $p = 0,03$ ); 1 paciente con CPAP y 3 pacientes control tuvieron eventos vasculares recurrentes; la tasa de eventos no fue diferente entre los grupos                                                                                                                                                                                                                                                                                                                                                                                                                                                                                                  |
| <b>Parra et al.</b> <sup>49</sup>     | Estudio aleatorizado y ciego                                      | 140 pacientes con infarto cerebral isquémico con IAH $\geq 20$ /h fueron reclutados en los 3-6 días post infarto; la aleatorización a CPAP o no fue realizada durante 5 días                                                                                                                                                                                                                                                                         | 66 $\pm$ 9 (sin CPAP), 64 $\pm$ 9 (CPAP)                          | 29 $\pm$ 4 (sin CPAP), 30 $\pm$ 5 (CPAP)                         | De 71 pacientes aleatorizados a CPAP, 14 se negaron a participar luego de 1-3 noches y 6 pacientes adicionales se negaron a continuar luego de una media de 10 meses; en los otros, el uso medio del CPAP fue de 5.3 $\pm$ 1.9 h/noche; el porcentaje de pacientes que exhibieron mejoría en la escala neurológica canadiense y la escala de Rankin 1 mes luego del infarto fue significativamente mayor en los pacientes que recibieron CPAP que en los controles; los valores medios de la escala neurológica canadiense y la escala de Rankin no fueron diferentes entre los grupos en ningún punto temporal; en los log rank tests, el CPAP mejoró la supervivencia cardiovascular (100% vs 89,9%; $p = 0,02$ ); hubo una tendencia no significativa hacia una mayor sobrevida sin evento cardiovascular en los pacientes con CPAP que en los controles (89,5% vs 75,4%, $p = 0,06$ ) |

Continuación

**Tabla 1** Continuación

| Estudio                       | Tipo                                                              | Pacientes                                                                                                                                                                    | Edad, años                                                  | IMC, kg/m <sup>2</sup>                                      | Hallazgos                                                                                                                                                                                                                                                                                                                                                                                                                                                                                                                                                                                                                                                                                                                                                                                                                         |
|-------------------------------|-------------------------------------------------------------------|------------------------------------------------------------------------------------------------------------------------------------------------------------------------------|-------------------------------------------------------------|-------------------------------------------------------------|-----------------------------------------------------------------------------------------------------------------------------------------------------------------------------------------------------------------------------------------------------------------------------------------------------------------------------------------------------------------------------------------------------------------------------------------------------------------------------------------------------------------------------------------------------------------------------------------------------------------------------------------------------------------------------------------------------------------------------------------------------------------------------------------------------------------------------------|
| Minnerup et al. <sup>50</sup> | Estudio aleatorizado y ciego (evaluación ciega de los resultados) | 50 pacientes con infarto cerebral isquémico con IAH > 10/h fueron reclutados en la 1era noche post infarto; la aleatorización a CPAP o no se hizo durante 7 días             | 63 ± 11 (sin CPAP), 69 ± 10 (CPAP)                          | 27 ± 3 (sin CPAP), 28 ± 3 (CPAP)                            | Cuarenta por ciento de los pacientes con TRS tuvieron un uso de CPAP aceptable (≥ 4 h/noche), 56% algún uso (< 4 h/noche), y 4% ningún uso; los pacientes que recibieron CPAP revelaron una tendencia no significativa hacia una mayor mejoría en la escala de infarto NIH (-2,0) en comparación con los controles (-1,4; p = 0,09)                                                                                                                                                                                                                                                                                                                                                                                                                                                                                               |
| Brown et al. <sup>51</sup>    | Estudio aleatorizado y doble ciego                                | 32 pacientes con infarto cerebral isquémico con IAH ≥ 5/h fueron reclutados durante los 7 días postinfarto; la aleatorización a CPAP simulado o CPAP se hizo durante 90 días | Mediana 74 (Q1, Q3: 55, 81) (sham CPAP), 61 (46, 76) (CPAP) | Mediana 29 (Q1, Q3: 28, 32) (sham CPAP), 28 (23, 31) (CPAP) | De 15 pacientes que comenzaron un escalonamiento activo del CPAP, 11 (73%) se llevaron el dispositivo a su casa y 8 (53%) completaron el seguimiento de 90 días; de 17 participantes que comenzaron el escalonamiento simulado (sham), 11 (65%) se llevaron el dispositivo sham a su casa y completaron el seguimiento de 90 días; el uso acumulado fue pobre (media 0.8 h/noche para el sham CPAP; 0.6 h/noche para el CPAP); el uso promedio en los días utilizado fue de 3,5 (1.8, 4.1) h/noche para sham CPAP, 4,5 (2,6, 5,5) h/noche para CPAP; el 50% de los pacientes que recibieron CPAP y el 0% de los que recibieron sham CPAP se sintieron más despiertos durante el día; el resultado de infarto cerebral evaluado por el índice de Barthel, la escala de Rankin y la escala de infarto NIH permanecieron sin cambios |

Abreviaturas: IAH = índice apnea-hipopnea; IMC = índice de masa corporal; MMSE = Examen de Estado Mínimo Mental. Si no se menciona otra cosa, los datos son media ± DE.

promueven el sueño NREM y el REM tuvieron un efecto favorable sobre la neuroplasticidad y la recuperación del infarto cerebral.<sup>41</sup> En 13 pacientes con infarto cerebral crónico, la terapia del lenguaje basada en imitación aumentó la actividad de ondas lentas (AOL) durante el sueño, evaluado por EEG de alta densidad.<sup>42</sup> La AOL en áreas relacionadas con el lenguaje se correlacionó fuertemente con mejoría en los puntajes de afasia.<sup>42</sup> Estos datos argumentan a favor de un rol sustancial del sueño NREM en la recuperación del infarto cerebral.

**SPI/MPES.** En 96 pacientes con infarto cerebral agudo seguidos durante 1 año, los pacientes con SPI (12,5%) tuvieron una mayor circunferencia de cuello, peor calidad del sueño y mayor prevalencia de diabetes que los pacientes sin SPI.<sup>14</sup> La recuperación del infarto cerebral evaluada mediante la Escala de Rankin y el Índice de Barthel fue peor en pacientes con SPI que sin SPI, luego de ajustar para diabetes e IMC. Debido al limitado tamaño de este estudio, no pudieron ajustarse otros factores de riesgo.

**DIAGNÓSTICO Y TERAPIA Trastorno respiratorio del sueño.** El TRS puede ser diagnosticado de forma precisa en pacientes con infarto cerebral mediante una poligrafía respiratoria, en la cual se miden el flujo de aire nasal, los movimientos respiratorios y la saturación de oxígeno capilar. Otros métodos de *screening* más simples –pero menos precisos– son la oximetría o la medición de flujo nasal, que puede ser combinado con cuestionarios sobre SPI (por ej., cuestionario Berlín). El tratamiento de elección para la AOS es el CPAP. En pacientes con ASC/RCS, pueden considerarse el oxígeno, la presión de aire positiva bifásica o la servoventilación adaptativa. En pacientes con hipoventilación central pueden

volverse necesarios la ventilación mecánica y raramente la traqueostomía.

Ocho estudios aleatorizados investigaron los efectos del CPAP post infarto cerebral (tabla 1),<sup>43-51</sup> de los cuales 5<sup>45,48-51</sup> fueron iniciados en la fase aguda del infarto, o sea la primera semana posterior al infarto. La mayoría de los estudios notaron una adherencia aceptable al CPAP (≥ 4 h/n) en más de la mitad de los pacientes.<sup>43,45,47-50</sup> Dos estudios (uno agudo, otro post agudo) reportaron un pobre uso del CPAP (0.6-1.4 h/noche).<sup>44,51</sup> Siete estudios no utilizaron el CPAP como condición de control.<sup>43-45,47-50</sup> Un estudio utilizó un falso CPAP; este estudio fue realmente doble-ciego.<sup>51</sup> A pesar del tamaño pequeño de la muestra (fueron incluidos un total de 484 pacientes), 4 de 8 estudios reportaron efectos favorables del CPAP, como ser mejorías significativas en la recuperación neurológica,<sup>47,48</sup> en la somnolencia,<sup>47</sup> en la depresión<sup>43,47</sup> y en los eventos vasculares recurrentes.<sup>49</sup> Un estudio encontró una tendencia no significativa hacia una mejor recuperación neurológica en pacientes que recibían CPAP.<sup>50</sup> Los 3 estudios restantes no reportaron cambios significativos en el pronóstico, pero sí asociaciones beneficiosas entre el uso de CPAP y al menos algunos aspectos del despertar en la vida diaria,<sup>51</sup> la recuperación neurológica<sup>44</sup> o las tasas bajas de eventos vasculares recurrentes.<sup>45</sup>

Estos hallazgos contrastan con el gran número de estudios negativos de farmacología en infarto cerebral. Sin embargo, algunos estudios de CPAP fueron diseñados como estudios de factibilidad. Estos estudios no tuvieron el poder para demostrar cambios en el pronóstico. En varios estudios, los resultados primarios no fueron predefinidos. Hay estudios multicéntricos más grandes en proceso, con resultados predefinidos, por ej., *Sleep Disordered Breathing in Transient Ischemic Attack (TIA)/Ischemic Stroke and Conti-*

uous Positive Airway Pressure (CPAP) Treatment Efficacy (SAS-CARE) [Eficacia del Tratamiento de los Trastornos Respiratorios del Sueño en el Accidente Isquémico Transitorio (AIT)/Infarto Cerebral Isquémico con Presión de Aire Positiva Continua (CPAP)], (<https://www.clinicaltrials.gov/ct2/show/NCT01097967>). Sus resultados se esperan ansiosamente.

Un pequeño porcentaje de los pacientes con infarto cerebral reciben tratamiento con CPAP en el mundo. Sin embargo, la *American Heart Association* recientemente incluyó recomendaciones en el diagnóstico y tratamiento de los TRS, estableciendo que (1) podría considerarse un estudio del sueño en pacientes con infarto cerebral isquémico o AIT sobre la base de la muy alta prevalencia de apnea del sueño en esta población y (2) el tratamiento con CPAP podría ser considerado para pacientes con infarto cerebral

isquémico y AIT y apnea del sueño, dada la evidencia emergente que sugiere un mejor pronóstico (evidencia Clase IIb, recomendación B).<sup>52</sup>

En un estudio de cruzamiento en 18 pacientes con infarto cerebral isquémico con IAH > 5/h aleatorizados a terapia posicional (almohada terapéutica) o terapia no posicional en los 14 días post infarto, la terapia posicional redujo el IAH<sup>46</sup> (evidencia Clase III; tablas 1 y 2). La mediana y la mínima saturación de oxígeno permanecieron sin cambios.

En un estudio observacional en 10 pacientes con infarto cerebral isquémico con IAH > 15/h no elegibles para CPAP a los 4.8 ± 3.7 días post infarto, la insuflación trans-nasal con alto flujo de aire (18 L/min) redujo moderadamente el IAH de 40.7/h a 31.0/h y aumento el sueño de ondas lentas.<sup>53</sup> En 15 pacientes con infarto cerebral isquémico con ASC predominante no adherentes

**Tabla 2 Diagnóstico y tratamiento de los trastornos respiratorios del sueño y del despertar luego de un infarto cerebral**

| Trastorno del sueño-despertar                                                                 | Diagnóstico                                                                | Evitar/usar con precaución                                                                      | Tratamiento                                                                                                             | Nivel de evidencia/recomendación         |
|-----------------------------------------------------------------------------------------------|----------------------------------------------------------------------------|-------------------------------------------------------------------------------------------------|-------------------------------------------------------------------------------------------------------------------------|------------------------------------------|
| <b>Apnea obstructiva del sueño</b>                                                            | Historia, respirografía (polisomnografía)                                  | Alcohol, hipnóticos, antidepresivos sedativos                                                   | CPAP                                                                                                                    | IIb, B                                   |
|                                                                                               |                                                                            |                                                                                                 | Insuflación transnasal de aire a alto flujo                                                                             | IV, U                                    |
|                                                                                               |                                                                            |                                                                                                 | Evitar la posición de sueño supina con una almohada terapéutica                                                         | III, C <sup>a</sup>                      |
| <b>Apnea del sueño central/Respiración de Cheyne-Stokes</b>                                   | Historia, respirografía (polisomnografía)                                  | Alcohol, hipnóticos, antidepresivos sedativos                                                   | CPAP/Presión de aire positiva bifásica                                                                                  | IV, U                                    |
|                                                                                               |                                                                            |                                                                                                 | Servoventilación asistida                                                                                               | IV, U                                    |
|                                                                                               |                                                                            |                                                                                                 | Oxígeno                                                                                                                 | IV, U                                    |
| <b>Alteraciones del sueño y el despertar (hipersomnia, SDE, fatiga)</b>                       | Historia, cuestionarios (actigrafía, polisomnografía, tests de vigilancia) | Alcohol, hipnóticos, antidepresivos sedativos                                                   | Antidepresivos estimulantes (por ej., venlafaxina 37,5-150 mg/d)                                                        | IV, U                                    |
|                                                                                               |                                                                            |                                                                                                 | Estimulantes: modafinilo (100-200 mg/d), metilfenidato (5-60 mg/d)                                                      | IV, U                                    |
|                                                                                               |                                                                            |                                                                                                 | Levodopa (125-250 mg/d)                                                                                                 | IV, U                                    |
| <b>Insomnio</b>                                                                               | Historia (cuestionarios, actigrafía, polisomnografía)                      | Alcohol, cafeína, antidepresivos estimulantes                                                   | Zolpidem, zopiclona                                                                                                     | IV, U <sup>b</sup>                       |
|                                                                                               |                                                                            |                                                                                                 | Antidepresivos sedativos (amitriptilina 10-100 mg/d; trazodona 50-200 mg/d; mianserina 60 mg/d; mirtazapina 15-30 mg/d) | IV, U (mianserina: III, C <sup>a</sup> ) |
|                                                                                               |                                                                            |                                                                                                 | Higiene del sueño no farmacológica (evitar ruidos, tratar infecciones, evitar alcohol y cafeína a la noche)             | IV, U                                    |
| <b>Síndrome de piernas inquietas/ movimientos periódicos de los miembros durante el sueño</b> | Historia, polisomnografía                                                  | Antidepresivos, neurolépticos, metoclopramida, litio                                            | Levodopa (125-250 mg a la noche)                                                                                        | IV, U                                    |
|                                                                                               |                                                                            |                                                                                                 | Agonistas dopaminérgicos (ropinirol 0,25-1 mg/d, pramipexol 0,125-0,75 g/d)                                             | III, U                                   |
|                                                                                               |                                                                            |                                                                                                 | Gabapentin (150-300 mg/d)                                                                                               | IV, U                                    |
| <b>Trastornos del comportamiento del sueño REM</b>                                            | Historia, polisomnografía                                                  | Alcohol, antidepresivos (inhibidores de la recaptación de serotonina), estimulantes, selegilina | Clonazepam (0,5-2 mg a la noche)                                                                                        | IV, U                                    |

Abreviaturas: CPAP = presión de aire positiva continua; SDE = somnolencia diurna excesiva.

Recomendaciones basadas en la clasificación de recomendaciones de la *American Academy of Neurology*. Solo fueron considerados los estudios en pacientes con infarto cerebral.

<sup>a</sup>Se refiere a los efectos en el índice apnea-hipopnea o el sueño, no a resultados del infarto cerebral.

<sup>b</sup>Efecto beneficioso en resultados de infarto cerebral y la no probabilidad de riesgo de infarto recurrente.

al CPAP a los 11 meses post infarto cerebral, la servoventilación adaptativa redujo la SDE.<sup>54</sup> Hasta que haya más estudios disponibles, la servoventilación adaptativa debería ser utilizada con cautela, ya que se ha reportado una mortalidad aumentada durante la servoventilación adaptativa en pacientes con SDE con insuficiencia cardíaca sistólica.<sup>55</sup>

La pérdida de peso debería mejorar la SDE, pero esto no fue examinado sistemáticamente. El manejo del paciente siempre debería incluir la prevención y el tratamiento de complicaciones secundarias (infecciones respiratorias, dolor) y un uso cauteloso del alcohol y las drogas hipnosedantes, que afectan negativamente la respiración durante el sueño. En pacientes con infarto cerebral isquémico con TRS, los déficits motores severos (específicamente la parálisis facial/bulbar), los déficits cognitivos, la afasia y la depresión pueden representar factores que comprometan la adherencia al CPAP.<sup>56</sup>

**Hipersomnia/sueño excesivo/SDE.** Con la excepción de casos muy severos, la hipersomnia es frecuentemente no reconocida en la práctica clínica. La actigrafía permite detectar cambios en la necesidad de sueño/descanso en los pacientes con infarto cerebral,<sup>10</sup> pero puede tener un uso limitado en pacientes con déficits motores severos. Los cuestionarios de sueño (por ej., Escala de Somnolencia de Epworth, Escala de Severidad de la Fatiga), que evalúan la SDE y la fatiga, pueden subestimar la AOL en pacientes con infarto cerebral con autopercepción o herramientas de comunicación alteradas. La polisomnografía, los tests de latencias múltiples de sueño y los tests de mantenimiento del despertar se reservan para casos seleccionados. La correlación de la AOL post infarto cerebral y el EEG de sueño es limitada cuando el daño cerebral incluye las redes tálamo-corticales.<sup>11</sup> La polisomnografía revela típicamente una reducción del sueño NREM o REM, menos comúnmente un aumento.

El tratamiento de la hipersomnia/SDE post infarto cerebral es un desafío (tabla 2). En pacientes con infarto talámico paramediano, se reportaron mejoras en los patrones de sueño con bromocriptina 20-40 mg, modafinilo 200 mg o metilfenidato 20-50 mg (evidencia Clase IV).<sup>10</sup> Se observó un efecto favorable en la recuperación temprana del infarto cerebral con levodopa (100 mg/d) o metilfenidato (5-30 mg/d), que puede al menos estar en parte relacionado con una mejora en el despertar.<sup>2</sup> Los antidepressivos estimulantes también pueden mejorar la hipersomnia. Todavía debe demostrarse si el tratamiento de la hipersomnia, la SDE o la fatiga mejoran el pronóstico del infarto cerebral y el riesgo de recurrencia.

**Insomnio/sueño reducido.** La presencia de insomnio es frecuentemente ignorada en la práctica clínica. Los cuestionarios y la actigrafía pueden ser útil para reconocer el insomnio, pero pueden subestimar la AOL (ver arriba). La polisomnografía es principalmente utilizada para detectar insomnios secundarios (por ej., asociados a TRS o SPI/MPES).

El tratamiento del insomnio post infarto cerebral incluye poner a los pacientes en habitaciones silenciosas durante la noche, protección del ruido y la luz, exposición a la luz y actividad física durante el día, y, cuando es necesario, el uso temporario de hipnóticos que estén relativamente exentos de efectos cognitivos y relajantes musculares, como el zolpidem, que en un estudio pequeño de 12 pacientes con infarto cerebral tuvo efectos similares en el tiempo total de sueño y la calidad de sueño que el lorazepam<sup>2</sup> y puede tener efectos beneficiosos en la recuperación del infarto cerebral sobre la base de estudios experimentales de infarto cerebral.<sup>57</sup> Las benzodiazepinas pueden empeorar los TRS y los déficits neuropsicológicos y llevar a una reemergencia de los déficits motores (tabla 2). Los antidepressivos sedantes pueden mejorar el insomnio post infarto cerebral (tabla 2). En 51 pacientes con infarto cerebral, la mianserina a 60 mg/d mejoró el insomnio, también en pacientes sin depresión (evidencia Clase III).<sup>2</sup>

En estudios de casos y controles, los hipnóticos elevaron el riesgo de infarto cerebral. En 12.747 pacientes con infarto cerebral isquémico pareados con participantes sin infarto, el uso de zolpidem estuvo asociado de forma dosis-dependiente con el riesgo de infarto cerebral isquémico (OR 1,50 para > 470 mg de zolpidem/año).<sup>58</sup> En una cohorte de 38.671 pacientes con uso de benzodiazepinas, pareados con pacientes sin uso de benzodiazepinas, una dosis anual alta de benzodiazepinas ( $\geq 4$  g) o una larga duración del tratamiento ( $\geq 95$  días) aumentó la incidencia de infarto cerebral.<sup>59</sup> Se requieren más estudios para delinear los efectos de los hipnóticos en la recuperación y la recurrencia del infarto cerebral.

**SPI/MPES.** El SPI es un diagnóstico clínico, mientras que el diagnóstico de MPES requiere de una polisomnografía. Los síntomas de SPI frecuentemente no son percibidos por los pacientes con infarto cerebral.

Los pacientes con SPI/MPES asociado a infarto cerebral pueden ser tratados con agonistas dopaminérgicos (ropinirol 0,25-1 mg/d, pramipexol 0,125-0,5 mg/d) o gabapentin (150-300 mg/d) (tabla 2). Usando agonistas dopaminérgicos, Lee et al.<sup>13</sup> reportaron una mejoría marcada en casi todos los pacientes. La mejoría espontánea se encontró en aproximadamente 1 de 4 pacientes.<sup>13</sup> Los antidepressivos, los neurolépticos, la metoclopramida y el litio deberían ser evitados cuando sea posible, porque pueden agravar el SPI/MPES. Todavía debe demostrarse si el



tratamiento del SPI/MPES tiene influencia en el pronóstico o recurrencia del infarto cerebral.

**Trastorno de comportamiento del sueño REM.** El TCSR puede ser sospechado sobre la base de la clínica, pero el diagnóstico requiere una videopolisomnografía. El clonazepam al momento de irse a dormir mejora eficientemente el TCSR. Aunque se trata de una evidencia Clase IV, los pacientes con infarto cerebral con TCSR pueden recibir clonazepam (0,5-2,0 mg) (tabla 2). El alcohol, los inhibidores de la recaptación de serotonina, los estimulantes y la selegilina agravan el TCSR. Deberían ser evitados en el TCSR.

#### DIRECCIONES Y RECOMENDACIONES FUTURAS

Los enfoques sistemáticos para el diagnóstico y tratamiento del TRS y AOL deberían ser implementados en el manejo del infarto cerebral y el AIT. La oximetría o las mediciones de flujo nasal pueden sugerir TRS, que debería ser confirmado por respirografía antes del tratamiento. Las historias clínicas cuidadosas, cuestionarios y actigrafías mejoran la detección de AOL. El tratamiento es relevante para la recuperación y el pronóstico del infarto cerebral, pero debería ser utilizado de forma cuidadosa considerando los efectos colaterales potenciales.

#### CONTRIBUCIONES DE LOS AUTORES

D.M.H., C.L.B.: concepto y diseño del estudio, adquisición de datos y artículos, análisis e interpretación, revisión crítica del manuscrito para el contenido intelectual importante, supervisión del estudio. D.M.H.: borrador del manuscrito.

#### FONDOS PARA EL ESTUDIO

No se reportan fondos para este estudio.

#### DECLARACIÓN DE INTERESES

Los autores no tienen nada para declarar relevante al manuscrito. Ir a [Neurology.org](http://Neurology.org) para declaraciones completas.

*Recibido el 27 de diciembre de 2015. Aceptado en su formato final el 9 de junio de 2016.*

#### BIBLIOGRAFÍA

1. Bassetti CL, Ferini-Strambi L, Brown S, et al. Neurology and psychiatry: waking up to opportunities of sleep: state of the art and clinical/research priorities for the next decade. *Eur J Neurol* 2015;22:1337-1354.
2. Hermann DM, Bassetti CL. Sleep-related breathing and sleep-wake disturbances in ischemic stroke. *Neurology* 2009;73:1313-1322.
3. Johnson KG, Johnson DC. Frequency of sleep apnea in stroke and TIA patients: a meta-analysis. *J Clin Sleep Med* 2010;6:131-137.
4. Ciccone A, Proserpio P, Roccatagliata DV, et al. Wake-up stroke and TIA due to paradoxical embolism during long obstructive sleep apneas: a cross-sectional study. *Thorax* 2013;68:97-104.
5. Brown DL, McDermott M, Mowla A, et al. Brainstem infarction and sleep-disordered breathing in the BASIC sleep apnea study. *Sleep Med* 2014;15:887-891.
6. Manconi M, Zavalko I, Cereda C, et al. Longitudinal polysomnographic assessment from acute to subacute phase in infratentorial versus supratentorial stroke. *Cerebrovasc Dis* 2014;37:85-93.
7. Bassetti CL, Milanova M, Gugger M. Sleep-disordered breathing and acute ischemic stroke: diagnosis, risk

- factors, treatment, evolution, and long-term clinical outcome. *Stroke* 2006;37:967-972.
8. Yumino D, Redolfi S, Ruttanaumpawan P, et al. Nocturnal rostral fluid shift: a unifying concept for the pathogenesis of obstructive and central sleep apnea in men with heart failure. *Circulation* 2010;121:1598-1605.
9. Nopmaneejumruslers C, Kaneko Y, Hajek V, et al. Cheyne-Stokes respiration in stroke: relationship to hypoxemia and occult cardiac dysfunction. *Am J Respir Crit Care Med* 2005;171:1048-1052.
10. Bassetti C, Mathis J, Gugger M, et al. Hypersomnia following thalamic stroke: a report of 12 patients. *Ann Neurol* 1996;39:471-480.
11. Hermann DM, Siccoli MM, Brugger P, et al. Evolution of neurological, neuropsychological and sleep-wake disturbances in paramedian thalamic stroke. *Stroke* 2008;39:62-68.
12. Koenigs M, Holliday J, Solomon J, Grafman J. Left dorsomedial frontal brain damage is associated with insomnia. *J Neurosci* 2010;30:16041-16043.
13. Lee SJ, Kim JS, Song IU, et al. Poststroke restless legs syndrome and lesion location: anatomical considerations. *Mov Disord* 2009;24:77-84.
14. Medeiros CA, de Bruin PF, Paiva TR, et al. Clinical outcome after acute ischaemic stroke: the influence of restless legs syndrome. *Eur J Neurol* 2011;18:144-149.
15. Benbir G, Karadeniz D. Periodic leg movements in sleep in patients with supratentorial cerebral infarction. *Acta Neurol Belg* 2012;112:27-32.
16. Tang WK, Hermann DM, Chen YK, et al. Brainstem infarcts predict REM sleep behavior disorder in acute ischemic stroke. *BMC Neurol* 2014;14:88.
17. Yaggi HK, Concato J, Kernan WN, et al. Obstructive sleep apnea as a risk factor for stroke and death. *N Engl J Med* 2005;353:2034-2041.
18. Arzt M, Young T, Finn L, et al. Association of sleep disordered breathing and the occurrence of stroke. *Am J Respir Crit Care Med* 2005;172:1447-1451.
19. Munoz R, Duran-Cantolla J, Martinez-Vila E, et al. Severe sleep apnea and risk of ischemic stroke in the elderly. *Stroke* 2006;37:2317-2321.
20. Redline S, Yenokyan G, Gottlieb DJ, et al. Obstructive sleep apnea-hypopnea and incident stroke: the sleep heart health study. *Am J Respir Crit Care Med* 2010;182:269-277.
21. Lamberts M, Nielsen OW, Lip GY, et al. Cardiovascular risk in patients with sleep apnoea with or without continuous positive airway pressure therapy: follow-up of 4.5 million Danish adults. *J Intern Med* 2014;276:659-666.
22. Loke YK, Brown JW, Kwok CS, Niruban A, Myint PK. Association of obstructive sleep apnea with risk of serious cardiovascular events: a systematic review and meta-analysis. *Circ Cardiovasc Qual Outcomes* 2012;5:720-728.
23. Chang CC, Chuang HC, Lin CL, et al. High incidence of stroke in young women with sleep apnea syndrome. *Sleep Med* 2014;15:410-414.
24. Sánchez-de-la-Torre M, Campos-Rodríguez F, Barbé F. Obstructive sleep apnoea and cardiovascular disease. *Lancet Respir Med* 2013;1:61-72.
25. Leng Y, Cappuccio FP, Wainwright NW, et al. Sleep duration and risk of fatal and non-fatal stroke: a prospective study and meta-analysis. *Neurology* 2015;84:1072-1079.
26. Boden-Albala B, Roberts ET, Bazil C, et al. Daytime sleepiness and risk of stroke and vascular disease: findings from the Northern Manhattan Study (NOMAS). *Circ Cardiovasc Qual Outcomes* 2012;5:500-507.
27. Blachier M, Dauvilliers Y, Jaussent I, et al. Excessive daytime sleepiness and vascular events: the Three City Study. *Ann Neurol* 2012;71:661-667.
28. Ramos AR, Dong C, Rundek T, et al. Sleep duration is associated with white matter hyperintensity volume in

- older adults: the Northern Manhattan Study. *J Sleep Res* 2014;23:524–530.
29. Wu MP, Lin HJ, Weng SF, et al. Insomnia subtypes and the subsequent risks of stroke: report from a nationally representative cohort. *Stroke* 2014;45:1349–1354.
  30. Hsu CY, Chen YT, Chen MH, et al. The association between insomnia and increased future cardiovascular events: a nation-wide population-based study. *Psychosom Med* 2015;77:743–751.
  31. Westerlund A, Bellocco R, Sundström J, et al. Sleep characteristics and cardiovascular events in a large Swedish cohort. *Eur J Epidemiol* 2013;28:463–473.
  32. Li Y, Walters AS, Chiuev SE, et al. Prospective study of restless legs syndrome and coronary heart disease among women. *Circulation* 2012;126:1689–1694.
  33. Winter AC, Schürks M, Glynn RJ, et al. Restless legs syndrome and risk of incident cardiovascular disease in women and men: prospective cohort study. *BMJ Open* 2012;2:e000866.
  34. Szentkirályi A, Völzke H, Hoffmann W, Happe S, Berger K. A time sequence analysis of the relationship between cardiovascular risk factors, vascular diseases and restless legs syndrome in the general population. *J Sleep Res* 2013;22:434–442.
  35. Molnar MZ, Lu JL, Kalantar-Zadeh K, Kovesdy CP. Association of incident restless legs syndrome with outcomes in a large cohort of US veterans. *J Sleep Res* Epub 2015 Sep 17.
  36. Lin CH, Sy HN, Chang HW, et al. Restless legs syndrome is associated with cardio/cerebrovascular events and mortality in end-stage renal disease. *Eur J Neurol* 2015;22:142–149.
  37. Birkbak J, Clark AJ, Rod NH. The effect of sleep disordered breathing on the outcome of stroke and transient ischemic attack: a systematic review. *J Clin Sleep Med* 2014;10:103–108.
  38. Harris AL, Elder J, Schiff ND, Victor JD, Goldfine AM. Post-stroke apathy and hypersomnia lead to worse outcomes from acute rehabilitation. *Transl Stroke Res* 2014;5:292–300.
  39. Glader EL, Stegmayr B, Asplund K. Poststroke fatigue: a 2-year follow-up study of stroke patients in Sweden. *Stroke* 2002;33:1327–1333.
  40. Zunzunegui C, Gao B, Cam E, Hodor A, Bassetti CL. Sleep disturbance impairs stroke recovery in the rat. *Sleep* 2011;34:1261–1269.
  41. Hodor A, Palchykova S, Gao B, Bassetti CL. Baclofen and gamma-hydroxybutyrate differentially altered behavior, EEG activity and sleep in rats. *Neuroscience* 2015;284:18–28.
  42. Sarasso S, Määttä S, Ferrarelli F, et al. Plastic changes following imitation-based speech and language therapy for aphasia: a high-density sleep EEG study. *Neurorehabil Neural Repair* 2014;28:129–138.
  43. Sandberg O, Franklin KA, Bucht G, et al. Nasal continuous positive airway pressure in stroke patients with sleep apnoea: a randomized treatment study. *Eur Respir J* 2001; 18:630–634.
  44. Hsu CY, Vennelle M, Li HY, et al. Sleep-disordered breathing after stroke: a randomised controlled trial of continuous positive airway pressure. *J Neurol Neurosurg Psychiatry* 2006;77:1143–1149.
  45. Bravata DM, Concato J, Fried T, et al. Auto-titrating continuous positive airway pressure for patients with acute transient ischemic attack: a randomized feasibility trial. *Stroke* 2010;41:1464–1470.
  46. Svatikova A, Chervin RD, Wing JJ, et al. Positional therapy in ischemic stroke patients with obstructive sleep apnea. *Sleep Med* 2011;12:262–266.
  47. Ryan CM, Bayley M, Green R, Murray BJ, Bradley TD. Influence of continuous positive airway pressure on outcomes of rehabilitation in stroke patients with obstructive sleep apnea. *Stroke* 2011;42:1062–1067.
  48. Bravata DM, Concato J, Fried T, et al. Continuous positive airway pressure: evaluation of a novel therapy for patients with acute ischemic stroke. *Sleep* 2011;34:1271–1277.
  49. Parra O, Sánchez-Armengol A, Capote F, et al. Efficacy of continuous positive airway pressure treatment on 5-year survival in patients with ischaemic stroke and obstructive sleep apnea: a randomized controlled trial. *J Sleep Res* 2015;24:47–53.
  50. Minnerup J, Ritter MA, Wersching H, et al. Continuous positive airway pressure ventilation for acute ischemic stroke: a randomized feasibility study. *Stroke* 2012;43:1137–1139.
  51. Brown DL, Chervin RD, Kalbfleisch JD, et al. Sleep apnea treatment after stroke (SATS) trial: is it feasible? *J Stroke Cerebrovasc Dis* 2013;22:1216–1224.
  52. Kernan WN, Ovbiagele B, Black HR, et al. Guidelines for the prevention of stroke in patients with stroke and transient ischemic attack: a guideline for healthcare professionals from the American Heart Association/American Stroke Association. *Stroke* 2014;45:2160–2236.
  53. Haba-Rubio J, Andries D, Rey V, et al. Effect of transnasal insufflation on sleep disordered breathing in acute stroke: a preliminary study. *Sleep Breath* 2012;16:759–764.
  54. Brill AK, Rösti R, Hefji JP, et al. Adaptive servoventilation as treatment of persistent central sleep apnea in post-acute ischemic stroke patients. *Sleep Med* 2014; 15:1309–1313.
  55. Cowie MR, Woehrle H, Wegscheider K, et al. Adaptive servo-ventilation for central sleep apnea in systolic heart failure. *N Engl J Med* 2015;373:1095–1105.
  56. Benbir G, Karadeniz D. A pilot study of the effects of non-invasive mechanical ventilation on the prognosis of ischemic cerebrovascular events in patients with obstructive sleep apnea syndrome. *Neurol Sci* 2012;33:811–818.
  57. Hiu T, Farzampour Z, Paz JT, et al. Enhanced phasic GABA inhibition during the repair phase of stroke: a novel therapeutic target. *Brain* 2016;139:468–480.
  58. Huang WS, Tsai CH, Lin CC, et al. Relationship between zolpidem use and stroke risk: a Taiwanese population based case-control study. *J Clin Psychiatry* 2013;74:e433–e438.
  59. Huang WS, Muo CH, Chang SN, et al. Benzodiazepine use and risk of stroke: a retrospective population-based cohort study. *Psychiatry Clin Neurosci* 2014;68:255–262.
